# Supplementary material for: Second harmonic electron paramagnetic resonance spectroscopy and imaging reveal metallic lithium depositions in Li-ion batteries
Source: Copernicus journal article supplement (doi:10.5194/mr-2024-5), 2024-03-18

## Supplementary information

### Second harmonic electron paramagnetic resonance spectroscopy and imaging reveal metallic lithium depositions in Li-ion batteries

Charles-E. Dutoit<sup>1,2</sup>, Hania Ahouari<sup>1,3</sup>, Quentin Denoyelle<sup>4</sup>, Simon Pondaven<sup>5</sup> and Hervé Vezin<sup>1,2</sup>

<sup>1</sup>Université Lille Nord de France, CNRS UMR8516, LASIRE, 59655 Villeneuve d'Ascq, France

<sup>2</sup>Centre de Résonance Magnétique Electronique pour les Matériaux et l'Energie, 59655 Villeneuve d'Ascq, France

<sup>3</sup>Université de Lille, FR 2638-IMEC-Institut Michel-Eugène Chevreul, 59655 Villeneuve d'Ascq, France

<sup>4</sup>SAFT, Corporate Research, 111 Boulevard Alfred Dancy, 33074 Bordeaux, France

<sup>5</sup>TotalEnergies, chemin du canal, 69360 Solaize, France

email: [charles.dutoit@univ-lille.fr](mailto:charles.dutoit@univ-lille.fr)

**Supplementary Figure S1:** 1<sup>st</sup> harmonic X-band EPR spectrum of graphite anode recorded after the first half lithiation (electrode potential of 86mV). The red line represents the simulation using a single dysonian function and shows that the experimental spectrum is correctly reproduced suggesting only one contribution.

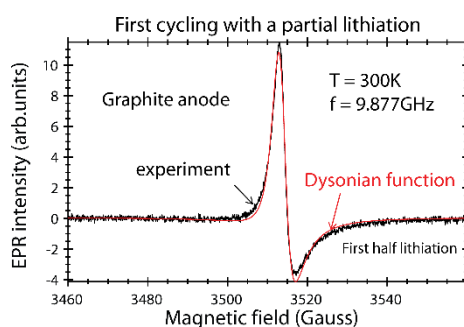

**Supplementary Figure S2:** **a** Voltage and current of the symmetric Li-metal electrochemical cell as a function of the cycling time. **b** Set of X-band EPR spectra of the cell recorded before cycling (i) and after the short circuit (ii). Both EPR signals (ii) were obtained using the 1<sup>st</sup> and the 2<sup>nd</sup> harmonic detection scheme respectively.

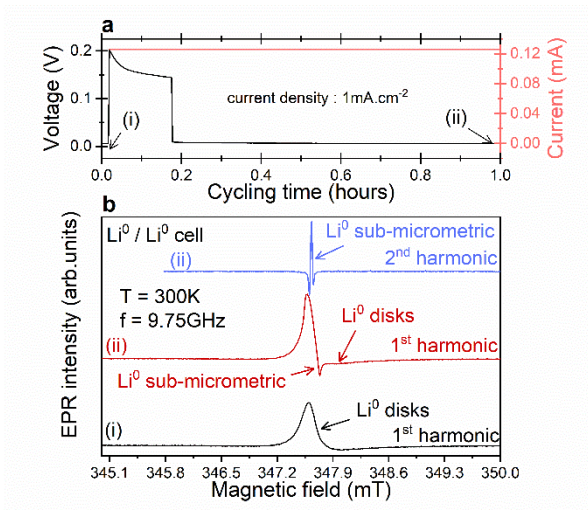

Supplement: Supplementary file 1 [file mr-2024-5-supplement.pdf]
