# Supplementary material for: Second harmonic electron paramagnetic resonance spectroscopy and imaging reveal metallic lithium depositions in Li-ion batteries
Source: Copernicus journal article supplement (doi:10.5194/mr-2024-5), 2024-03-18

## 2<sup>nd</sup> harmonic EPR spectrum

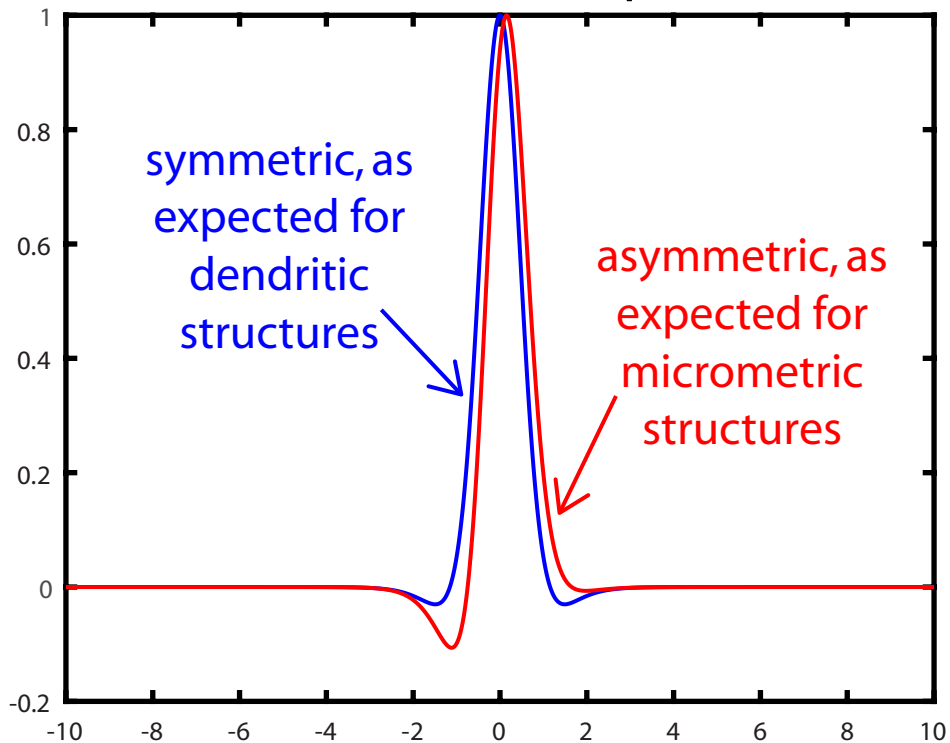

Supplement: Supplementary file [file mr-2024-5-AC7-supplement.pdf]
